# Supplementary material for: A Novel Benzopyrane Derivative Targeting Cancer Cell Metabolic and Survival Pathways
Source: MDPI journal article supplement (doi:10.3390/cancers13112840), 2021-06-07
Supplement: s1 [file s1]

# **A Novel benzopyrane derivative targeting cancer cell metabolic and survival pathways**

**Dana M. Zaher<sup>1,2,#</sup>, Wafaa S. Ramadan<sup>1,2,#</sup>, Raafat El-Awady<sup>1,3</sup>, Hany A. Omar<sup>1,3,4</sup>, Fatema Hersi<sup>1,2</sup>, Vunnam Srinivasulu<sup>1</sup>, Ibrahim Y. Hachim<sup>1,2</sup>, Farah I. Almarzooq<sup>1,5</sup>, Cijo G. Vazhappilly<sup>1,6</sup>, Salim Merali<sup>7</sup>, Carmen Merali<sup>7</sup>, Nelson C. Soares<sup>1,3</sup>, Paul Schilf<sup>8</sup>, Saleh M. Ibrahim<sup>1,2,8</sup>, Taleb H. Al-Tel<sup>1,3,\*</sup>**

<sup>1</sup>Sharjah Institute for Medical Researches, University of Sharjah, Sharjah, United Arab Emirates.

<sup>2</sup>College of Medicine, University of Sharjah, Sharjah, United Arab Emirates.

<sup>3</sup>College of Pharmacy, University of Sharjah, Sharjah, United Arab Emirates.

<sup>4</sup>Faculty of Pharmacy, Beni-Suef University, Beni-Suef, 62511 Egypt

<sup>5</sup>United Arab Emirates University, Department of Medical Microbiology and Immunology, College of Medicine and Health Sciences, Al Ain, United Arab Emirates.

<sup>6</sup>School of Arts and Sciences, American University of Ras Al Khaimah, P.O.Box:10021, Ras Al Khaimah, United Arab Emirates.

<sup>7</sup>Temple University, School of Pharmacy, 3307 N Broad Street, Room 552, Philadelphia, PA 19140, United States.

<sup>8</sup>Lübeck Institute of Experimental Dermatology, University of Lübeck, Ratzeburger Allee 160 23538 Lübeck, Germany.

\*Correspondance: taltal@sharjah.ac.ae, Tel: +97165057417

# These coauthors contributed equally to this work and are both first authors

**Supplementary Figure S1:** Screening of a small library of polysubstituted benzopyranes, for potential anti-cancer activity on cancer cell lines. **(a)** Dose dependent effect of the synthesized SIMR compounds on MCF7, SKBR3 and HCT-116 after 48 h treatment, as analyzed by SRB assay. Points, mean; bars, SEM ( $n=6$ ). **(b)** The  $IC_{50}$  of SIMR compounds in cancer cell lines after 48 h treatment. Data are mean  $\pm$  SEM ( $n=3$ ). **(c)** Dose dependent effect of the synthesized SIMR - 1281 on MCF7, MCF7 dox resistant, A549 and A549 dox resistant cell lines after 48 h treatment, as analyzed by MTT assay. Points, mean; bars, SEM ( $n=6$ ).

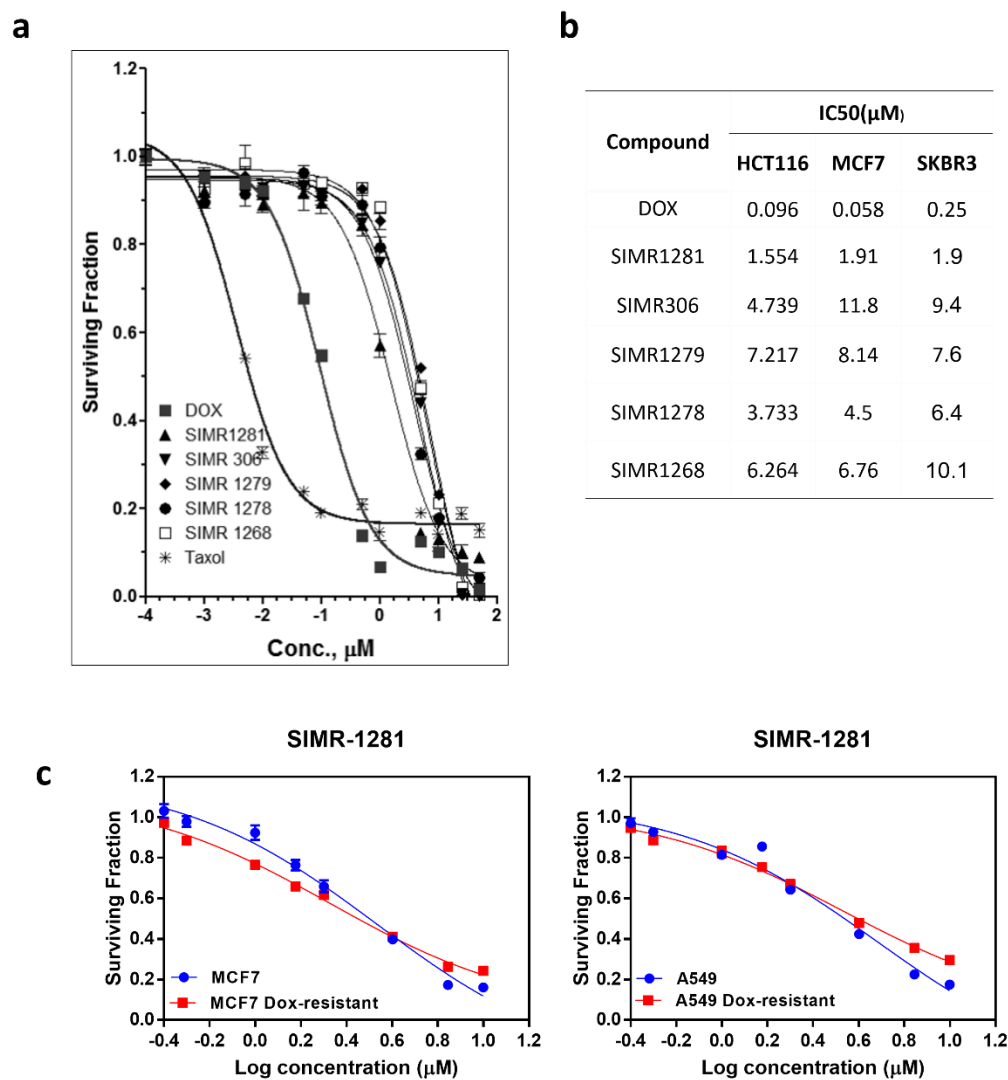

**Supplementary Figure S2:** DARST Assay showing the binding of SIMR1281 with protein targets

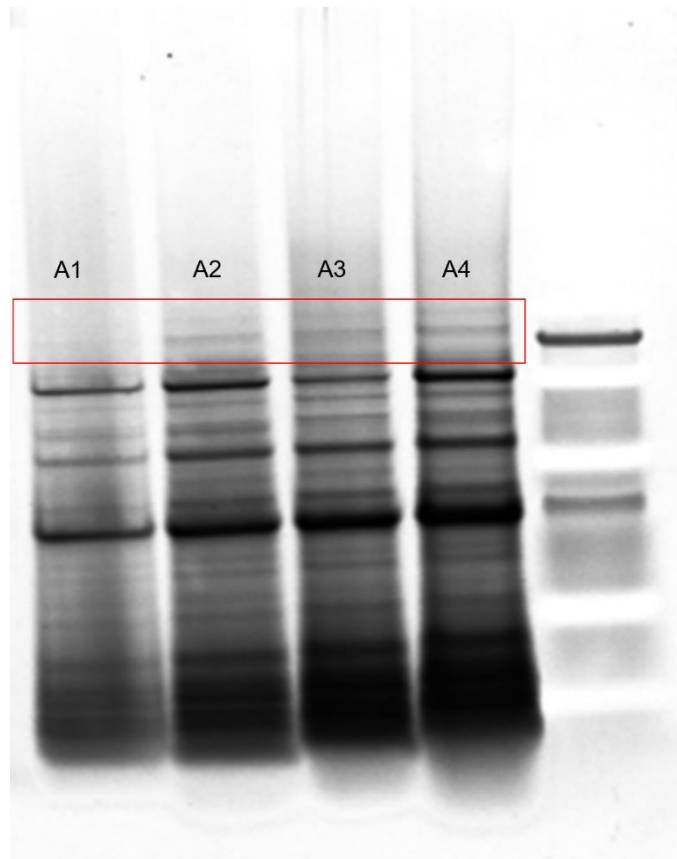

**Supplementary Figure S3:** Western blot analysis for  $\gamma$ -H2Ax/H2Ax, p-ATM/ATM and p-ATR/ATR proteins in MCF7, HCT116 and SKBR-3 cell lines after the treatment with SIMR-1281 and Dox for 24 h at the indicated concentrations (Whole blot corresponds to Fig3. a). **(a)** Quantification of the bands of  $\gamma$ -H2Ax, H2Ax, p-ATM, ATM, p-ATR and ATR proteins using Image lab software, Data expressed as mean  $\pm$  SEM ( $n=3$ ) independent experiments. \*indicates significant difference versus control at  $p<0.05$  determined by two-tailed unpaired  $t$ -test. **(b)** Full blot Western blot of the indicated proteins.

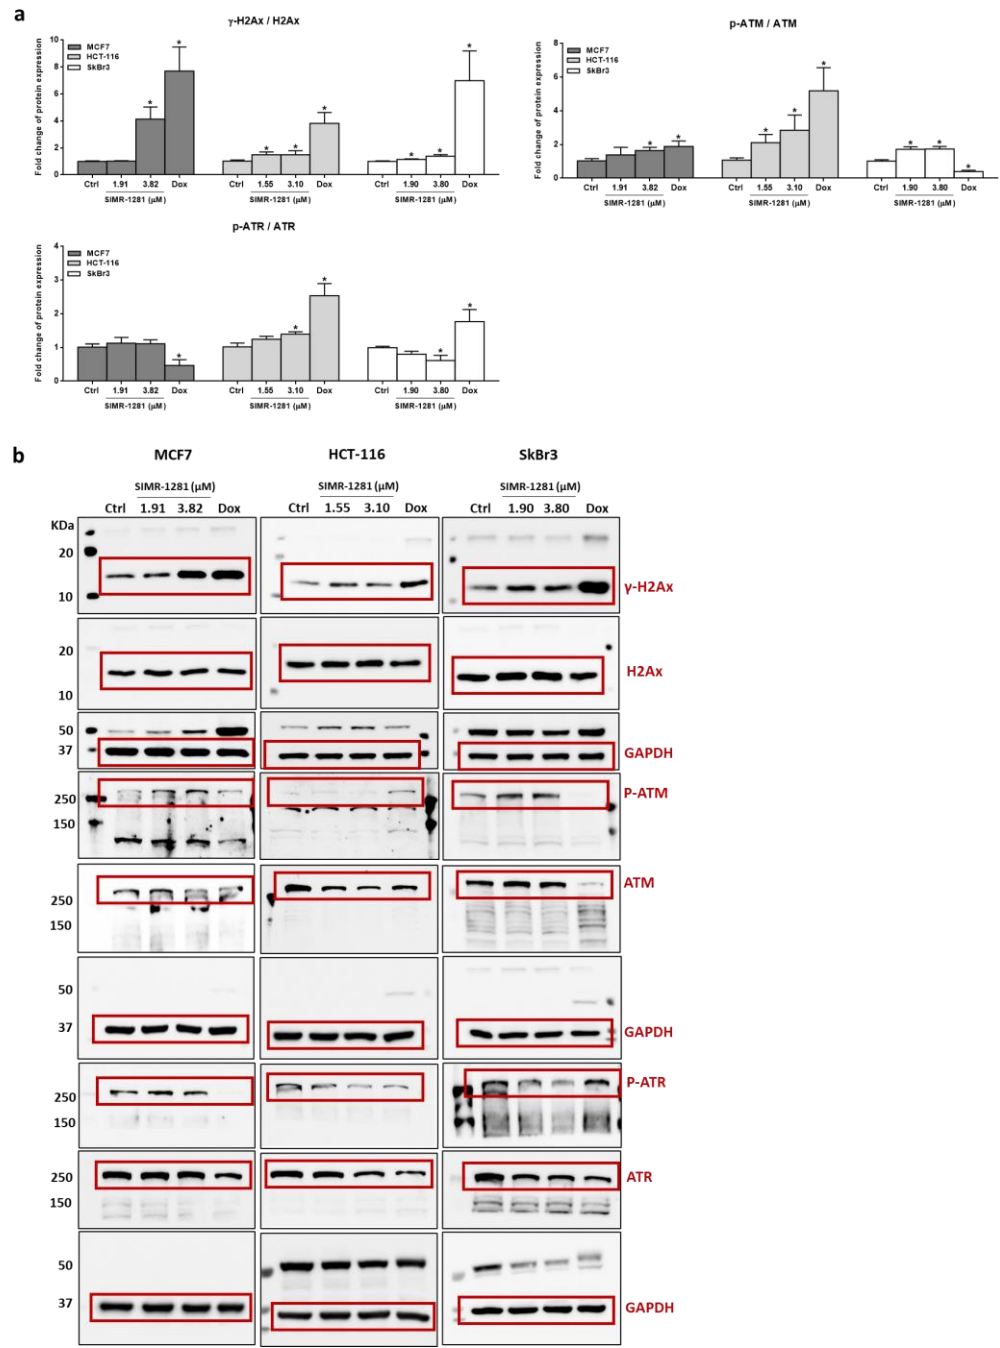

**Supplementary Figure S4:** Western blot analysis for p53, p21, p-Chk2/Chk2 and p-Chk1/Chk1 proteins in MCF7, HCT116 and SKBR-3 cell lines after the treatment with SIMR-1281 and Dox for 24 h at the indicated concentrations (Whole blot corresponds to Fig3. b). **(a)** Quantification of the bands of p53, p21, p-Chk2, Chk2, p-Chk1 and Chk1 proteins using Image lab software, Data expressed as mean  $\pm$  SEM ( $n=3$ ) independent experiments. \*indicates significant difference versus control at  $p<0.05$  determined by two-tailed unpaired  $t$ -test. **(b)** Full blot Western blot of the indicated proteins

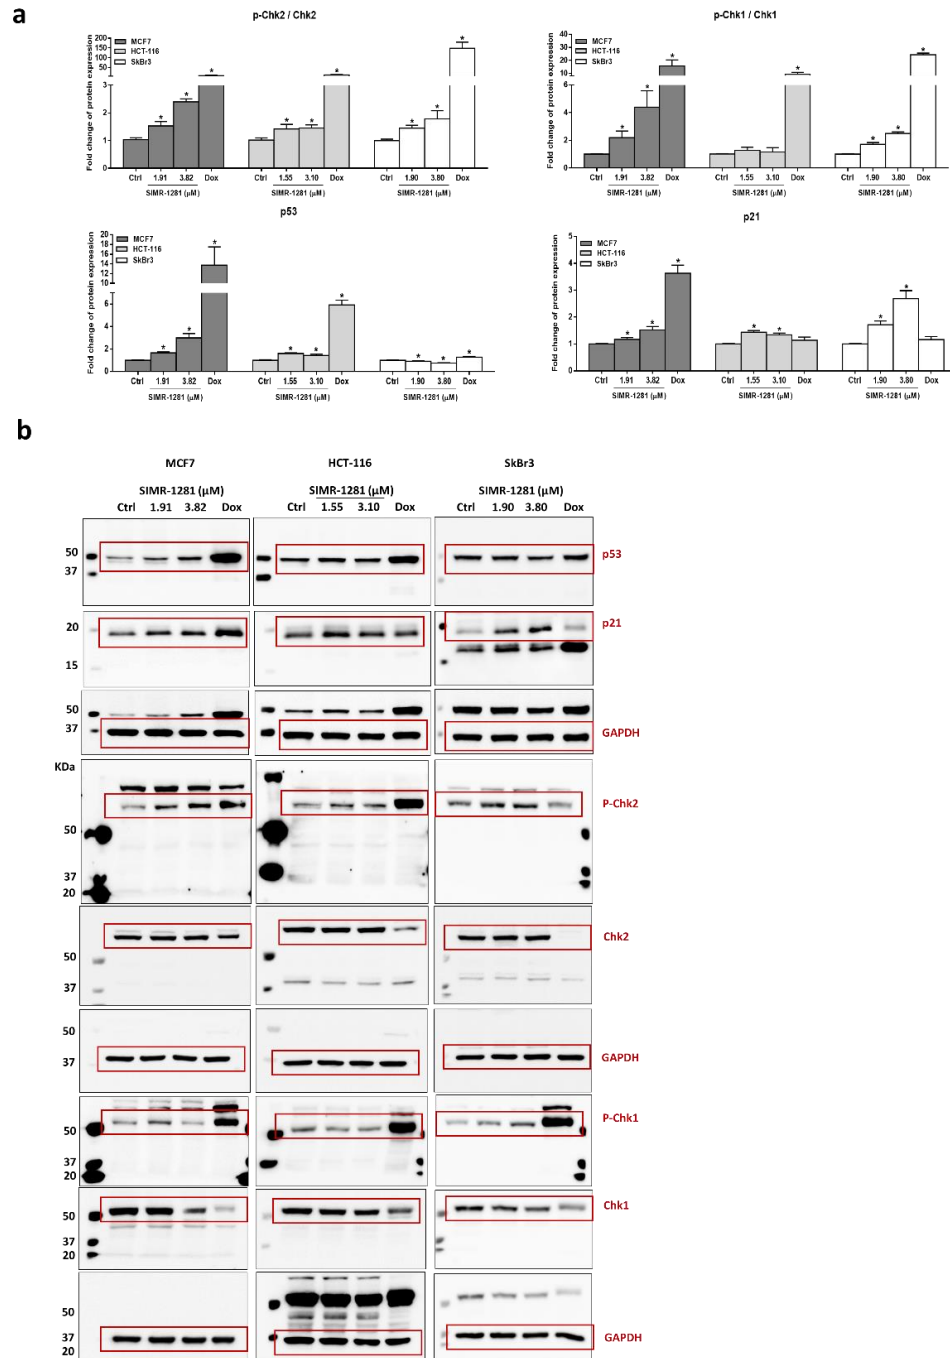

**Supplementary Figure S5:** Western blot analysis for Ras, p-ERK1/2, ERK1/2, p-Akt, Akt proteins in MCF7, HCT116 and SKBR-3 cell lines after the treatment with SIMR-1281 and Dox for 24 h at the indicated concentrations (Whole blot corresponds to Fig3. c). **(a)** Quantification of the bands of Ras, p-ERK1/2, ERK1/2, p-Akt, Akt proteins using Image lab software, Data expressed as mean  $\pm$  SEM ( $n=3$ ) independent experiments. \*indicates significant difference versus control at  $p<0.05$  determined by two-tailed unpaired  $t$ -test. **(b)** Full blot Western blot of the indicated proteins

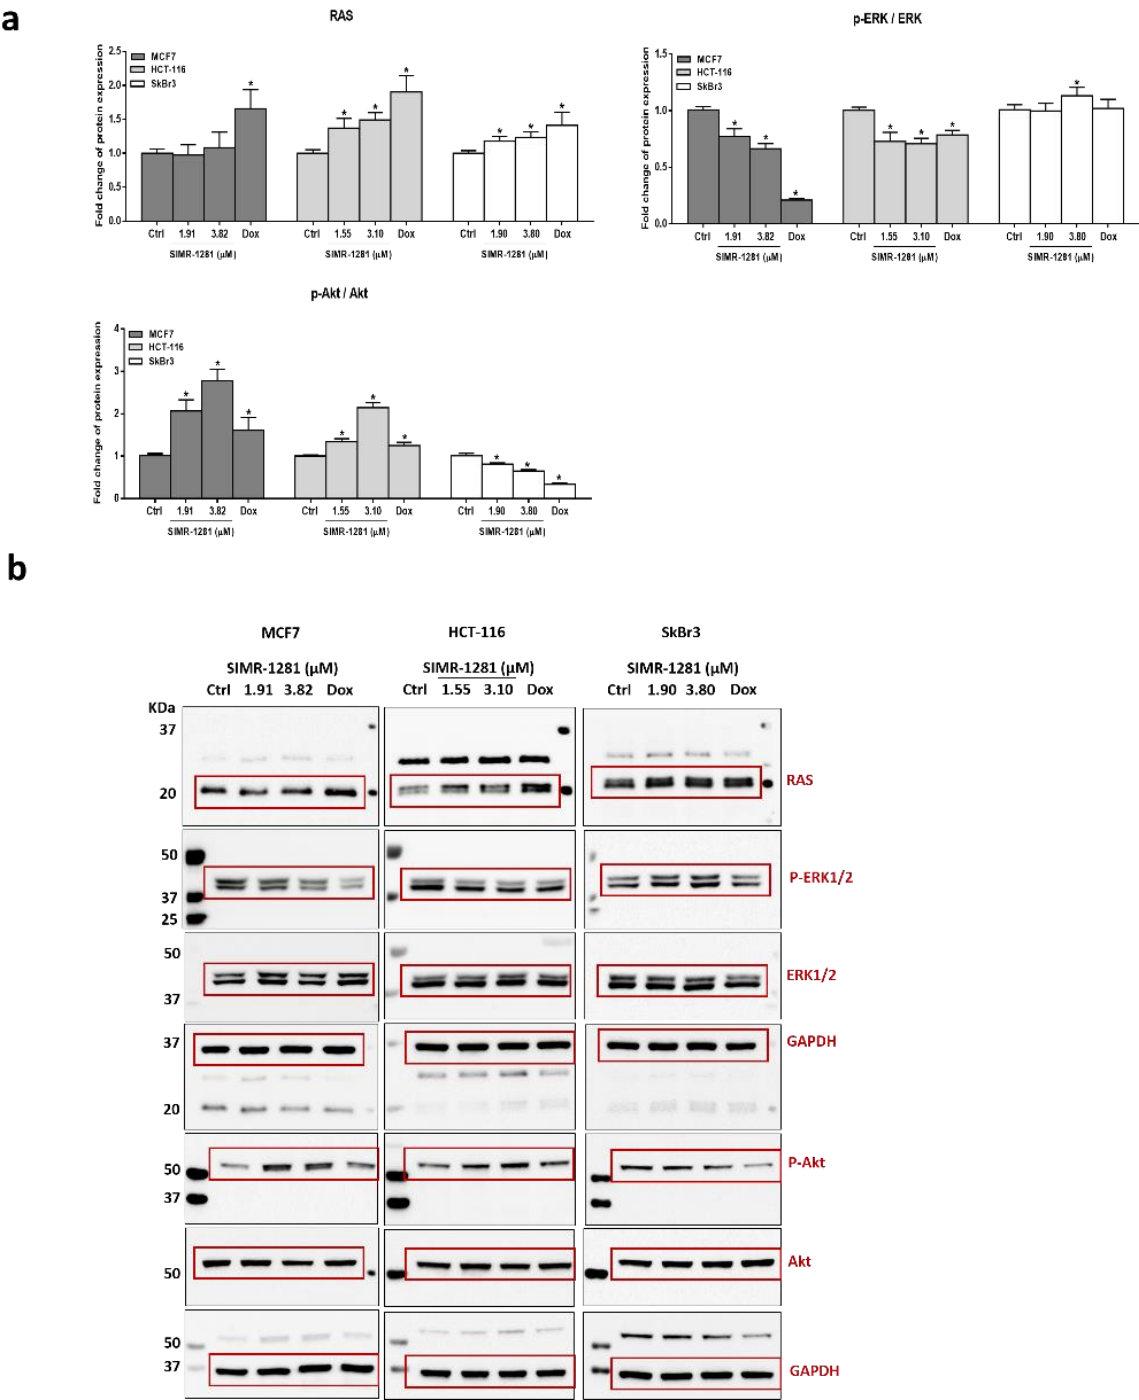

**Supplementary Figure S6:** Cell cycle analysis of MCF7, HCT116 and F-180 cells treated with SIMR-1281 at the indicated time points. **(a)** Histogram representation of the cell cycle distributions of MCF7, HCT116 and F-180 cells treated with SIMR-1281.

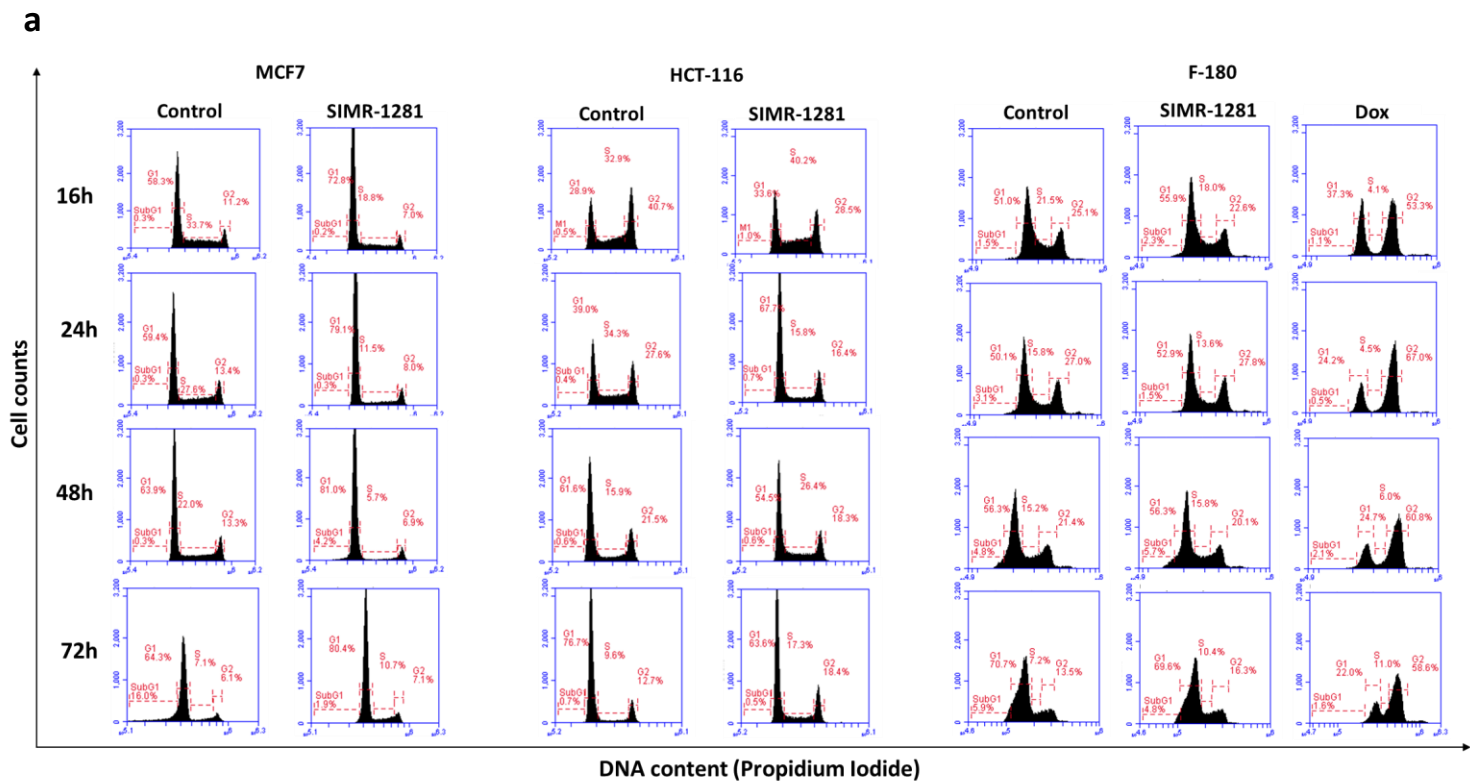

**Supplementary Figure S7:** Western blot analysis for caspase-3 and caspase-9 proteins in MCF7, HCT116 and SKBR-3 cell lines after the treatment with SIMR-1281 for 24 h at the indicated concentrations (Whole blot corresponds to Fig3. e). **(a)** Quantification of the cleavage bands of caspase 3 and caspase 9 proteins using Image lab software, Data expressed as mean  $\pm$  SEM ( $n=3$ ) independent experiments. \*indicates significant difference versus control at  $p<0.05$  determined by two-tailed unpaired  $t$ -test. **(b)** Full blot Western blot of the caspases proteins

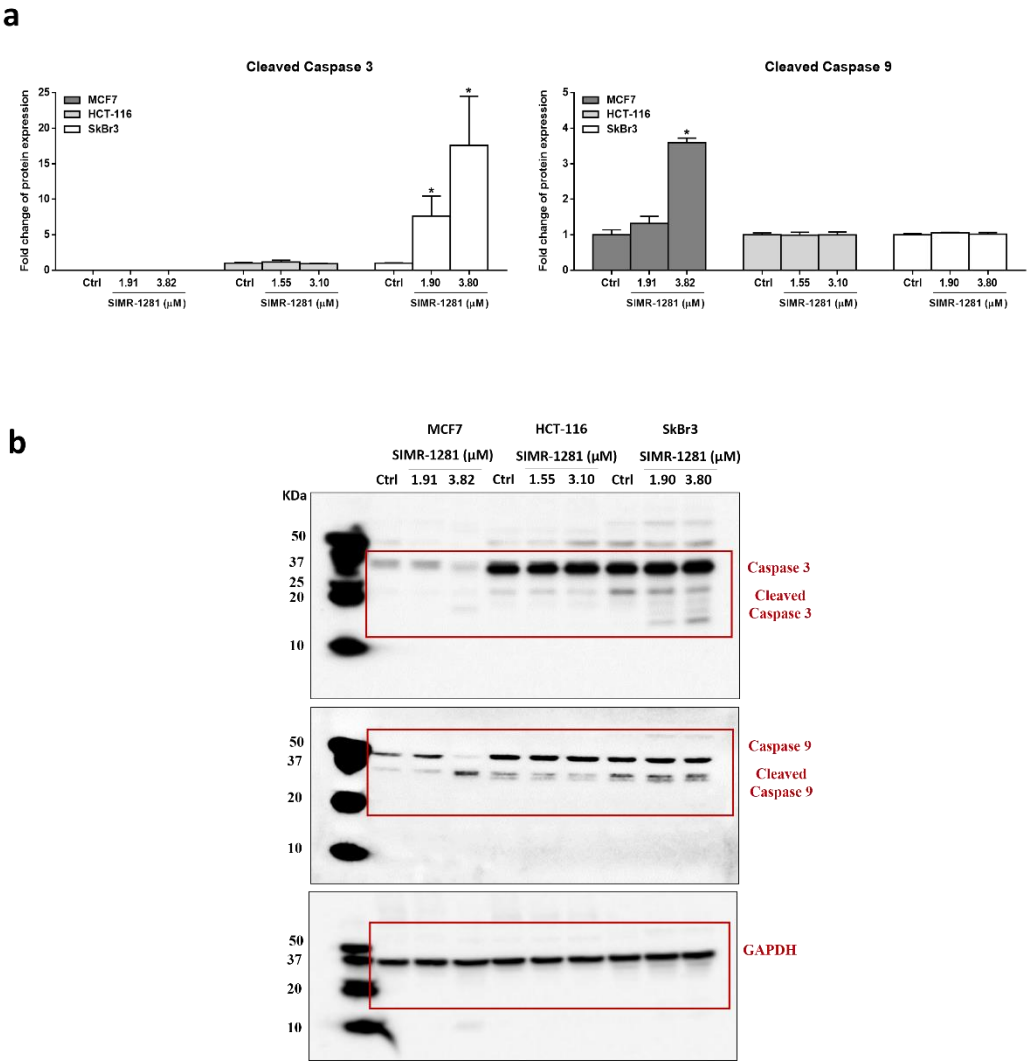



**Supplementary Figure S8:** Western blot analysis for apoptotic marker proteins in MCF7, HCT116 and SKBR-3 cell lines after the treatment with SIMR-1281 and Dox for 24 h at the indicated concentrations (Whole blot corresponds to Fig3. f). **(a)** Quantification of the apoptosis markers proteins bands using Image lab software, Data expressed as mean  $\pm$  SEM ( $n=3$ ) independent experiments. \*indicates significant difference versus control at  $p<0.05$  determined by two-tailed unpaired  $t$ -test. **(b)** Full blot Western blot of the apoptosis markers proteins

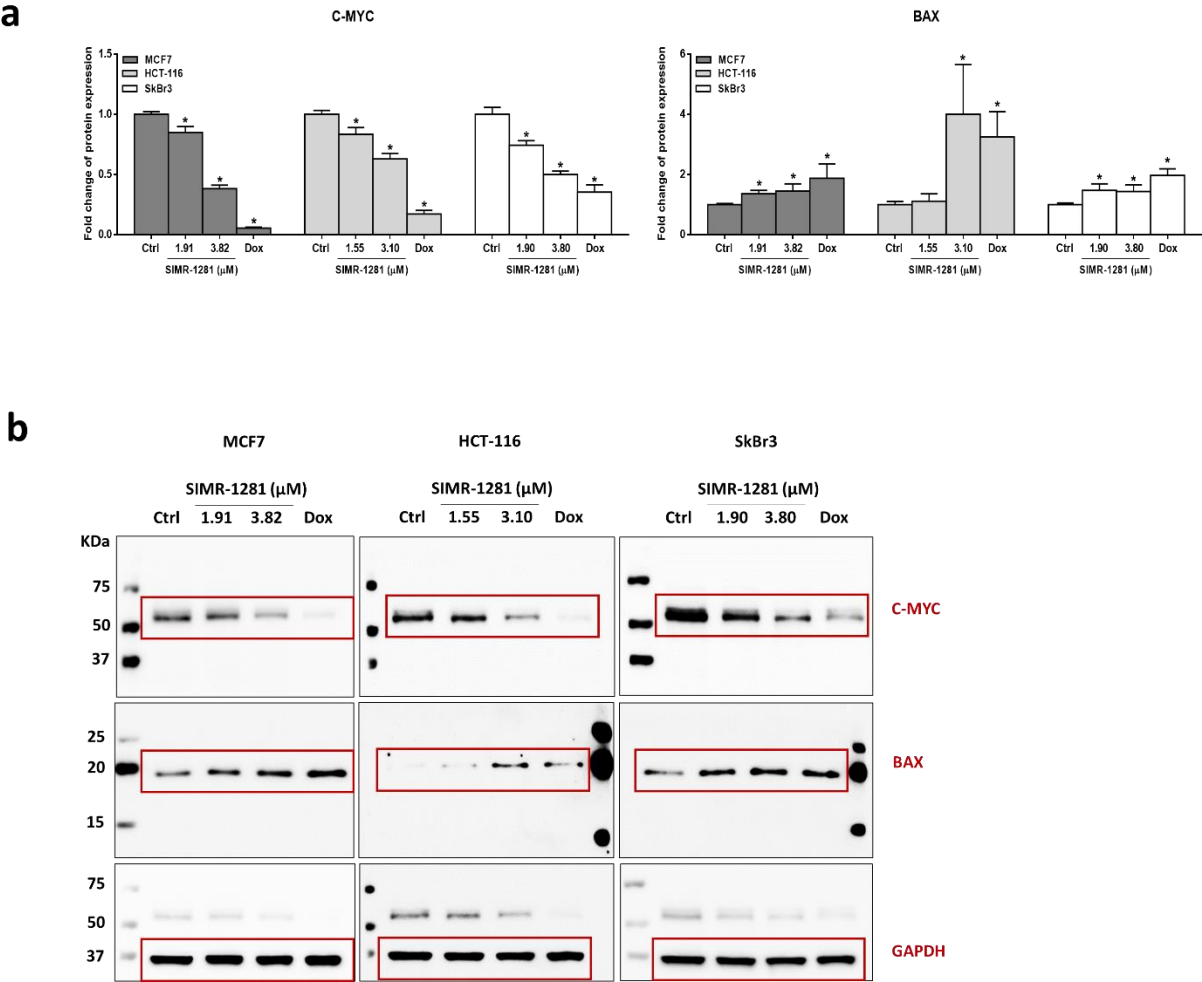

**Supplementary Figure S9:** Western blot analysis for cyclin A and cyclin B proteins in MCF7 cell line after the treatment with SIMR-1281 for 24 h at the indicated concentrations, (Whole blot corresponds to Fig4. c). **(a)** Quantification of cyclin A and cyclin B proteins using Image lab software, Data expressed as mean  $\pm$  SEM ( $n=3$ ) independent experiments. \*indicates significant difference versus control at  $p<0.05$  determined by two-tailed unpaired  $t$ -test. **(b)** Full blot Western blot of the cyclins proteins.

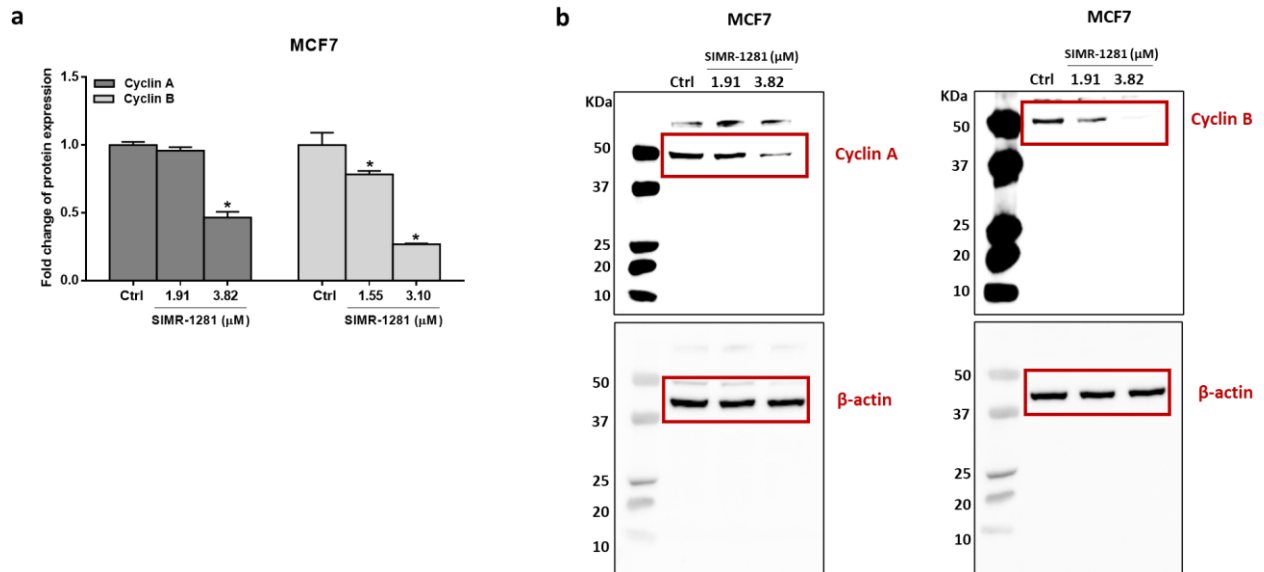

**Supplementary Figure S10:** Histogram representation of the cell cycle distributions of synchronized MCF7 cells at different time points.

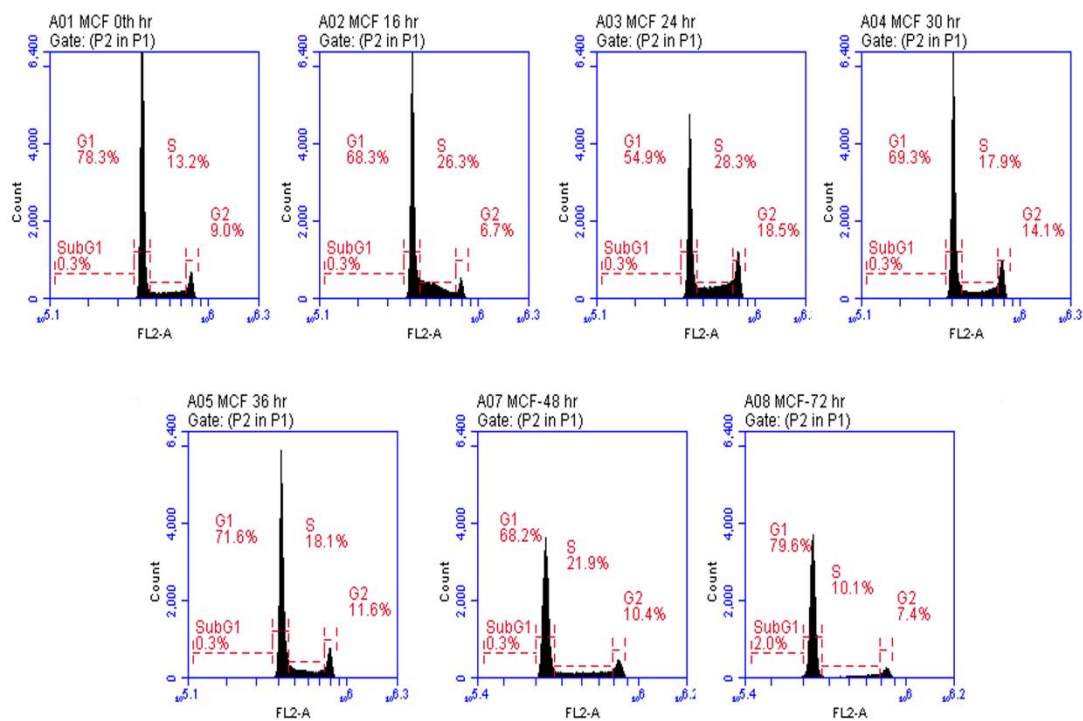

**Supplementary Figure S11:** Hematology values<sup>a</sup> and serum chemistry values<sup>a</sup> from athymic nude mice bearing subcutaneous HCT116 xenograft tumors after 30 days of treatment with SIMR-1281. Values represent means  $\pm$  SD. <sup>a</sup> WBC, white blood cells; RBC, red blood cells; HCT, Hematocrit; MCV, mean corpuscular volume; MCH, Mean Corpuscular Hemoglobin; MCHC, Mean Corpuscular Hemoglobin Concentration; RDW, Red blood cell distribution width; RDWSD, Red blood cell distribution width; PLT, platelet; MPV, mean platelet volume; LY, leukocytes; MO, monocytes; NE, neutrophils; EO, eosinophils; BA, basophils. <sup>b</sup> ALT, Alanine aminotransferase; Aspartate Aminotransferase (AST); Alkaline Phosphatase (Alk Phos, ALP); Gamma Glutamyl Transpeptidase (GGT, GGTP or GTP); Significant difference versus control \* **P<0.05** \*\***P<0.005** determined by two-tailed unpaired *t*-test.

| Hematology <sup>b</sup>            | Units                     | Vehicle            | SIMR-1281<br>(50mg/kg) |
|------------------------------------|---------------------------|--------------------|------------------------|
| WBC                                | $\times 10^3/\mu\text{l}$ | 2.44 $\pm$ 0.85    | 2.22 $\pm$ 1.15        |
| RBC                                | $\times 10^3/\mu\text{l}$ | 7.18 $\pm$ 0.31    | 6.72 $\pm$ 0.45        |
| Hemoglobin                         | g/dL                      | 12.42 $\pm$ 0.75   | 11.53 $\pm$ 0.76       |
| HCT                                | %                         | 32.34 $\pm$ 2.11   | 30.89 $\pm$ 2.18       |
| MCV                                | fL                        | 44.99 $\pm$ 1.35   | 45.96 $\pm$ 1.10       |
| MCH                                | pg                        | 17.28 $\pm$ 0.35   | 17.16 $\pm$ 0.25       |
| MCHC                               | g/dL                      | 38.42 $\pm$ 0.58   | 37.36 $\pm$ 1.06       |
| RDW                                | %                         | 23.61 $\pm$ 1.26   | 26.04* $\pm$ 1.43      |
| RDWSD                              | fL                        | 26.14 $\pm$ 0.5    | 29.46* $\pm$ 3.12      |
| PLT                                | $\times 10^3/\mu\text{l}$ | 853.63 $\pm$ 95.68 | 718.09 $\pm$ 371.26    |
| MPV                                | fL                        | 6.30 $\pm$ 0.40    | 7.69 $\pm$ 1.96        |
| LY                                 | %                         | 90.28 $\pm$ 0.40   | 86.64 $\pm$ 7.46       |
| MO                                 | %                         | 5.68 $\pm$ 2.81    | 8.03 $\pm$ 6.73        |
| NE                                 | %                         | 3.16 $\pm$ 1.72    | 4.25 $\pm$ 1.77        |
| EO                                 | %                         | 0.52 $\pm$ 0.27    | 0.81 $\pm$ 0.57        |
| BA                                 | %                         | 0.36 $\pm$ 0.21    | 0.27 $\pm$ 0.14        |
| <b>Serum Chemistry<sup>c</sup></b> |                           |                    |                        |
| Creatinine                         | mg/dL                     | 1.04 $\pm$ 0.89    | 1.176 $\pm$ 0.398      |
| ALT                                | iu/L                      | 25.19 $\pm$ 5.55   | 44.35 $\pm$ 14.84      |
| AST                                | iu/L                      | 91.25 $\pm$ 20.50  | 180.72 $\pm$ 54.93     |
| ALP                                | iu/L                      | 33.42 $\pm$ 19.21  | 25.722 $\pm$ 13.25     |
| GAMMA GT                           |                           | 11.88 $\pm$ 9.20   | 16.45 $\pm$ 2.041      |
| Total Bilirubin                    | mg/dL                     | 0.548 $\pm$ 0.040  | 0.7 $\pm$ 0.327        |
| Total Protein                      | g/dL                      | 7.136 $\pm$ 0.157  | 10.124 $\pm$ 4.383     |
| Albumin                            | g/dL                      | 3.277 $\pm$ 0.168  | 2.660** $\pm$ 0.2478   |
| Urea                               |                           | 51.22 $\pm$ 2.469  | 57.094 $\pm$ 12.29     |
| Glucose                            | mg/dL                     | 283.55 $\pm$ 20.00 | 176.59 $\pm$ 50.93     |
