# Supplementary material for: A Novel Benzopyrane Derivative Targeting Cancer Cell Metabolic and Survival Pathways
Source: MDPI journal article supplement (doi:10.3390/cancers13112840), 2021-06-07
Supplement: s1 [file s1]

# A Novel benzopyrane derivative targeting cancer cell metabolic and survival pathways

Dana M. Zaher<sup>1,2,#</sup>, Wafaa S. Ramadan<sup>1,2,#</sup>, Raafat El-Awady<sup>1,3</sup>, Hany A. Omar<sup>1,3,4</sup>, Fatema Hersi<sup>1,2</sup>, Vunnam Srinivasulu<sup>1</sup>, Ibrahim Y. Hachim<sup>1,2</sup>, Farah I. Almarzooq<sup>1,5</sup>, Cijo G. Vazhappilly<sup>1,6</sup>, Salim Merali<sup>7</sup>, Carmen Merali<sup>7</sup>, Nelson C. Soares<sup>1,3</sup>, Paul Schilf<sup>8</sup>, Saleh M. Ibrahim<sup>1,2,8</sup>, Taleb H. Al-Tel<sup>1,3,\*</sup>

\*Correspondance: [taltal@sharjah.ac.ae](mailto:taltal@sharjah.ac.ae), Tel: +97165057417

# These coauthors contributed equally to this work and are both first authors

## Supplementary file S2.

The MS/MS spectra of assigned to the identified peptides for each reported protein. Images were obtained from Maxquant viewer version (1.6.10.43)

sp|Q9NPH2|INO1\_HUMAN Inositol-3-phosphate synthase 1

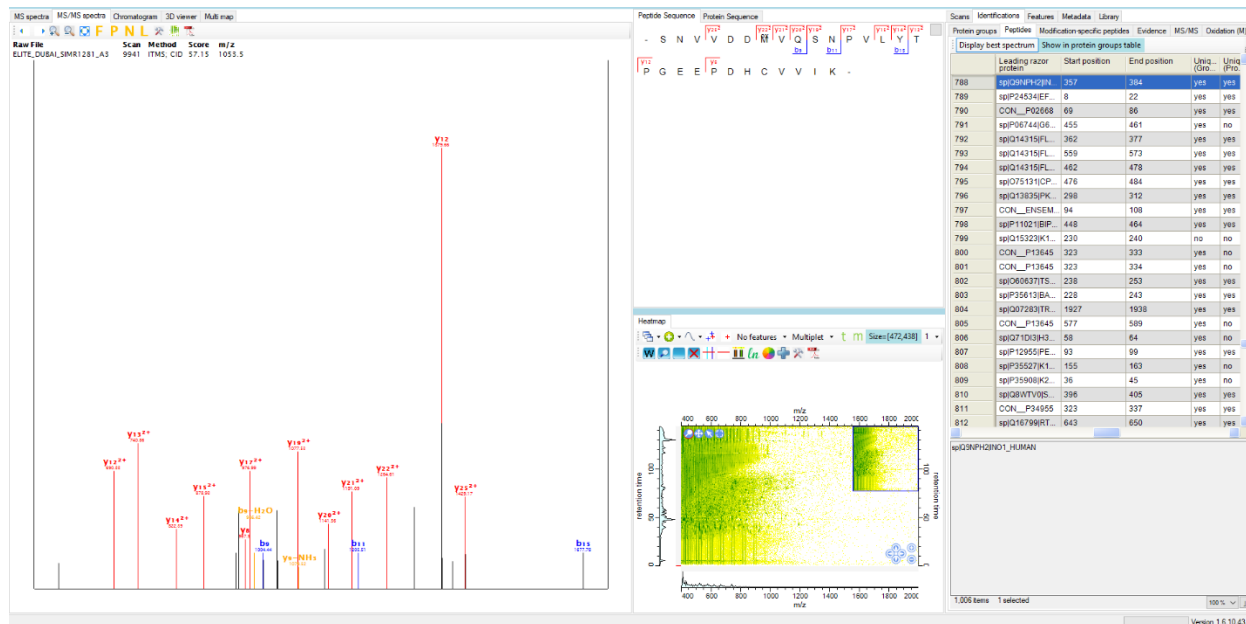

MS/MS fragmentation spectrum show both b- and y-ions of a peptide (SNVDDMVQSNPVLVTPGEEP~~DH~~CVVIK) assigned to sp|Q9NPH2|INO1\_HUMAN Inositol-3-phosphate synthase 1

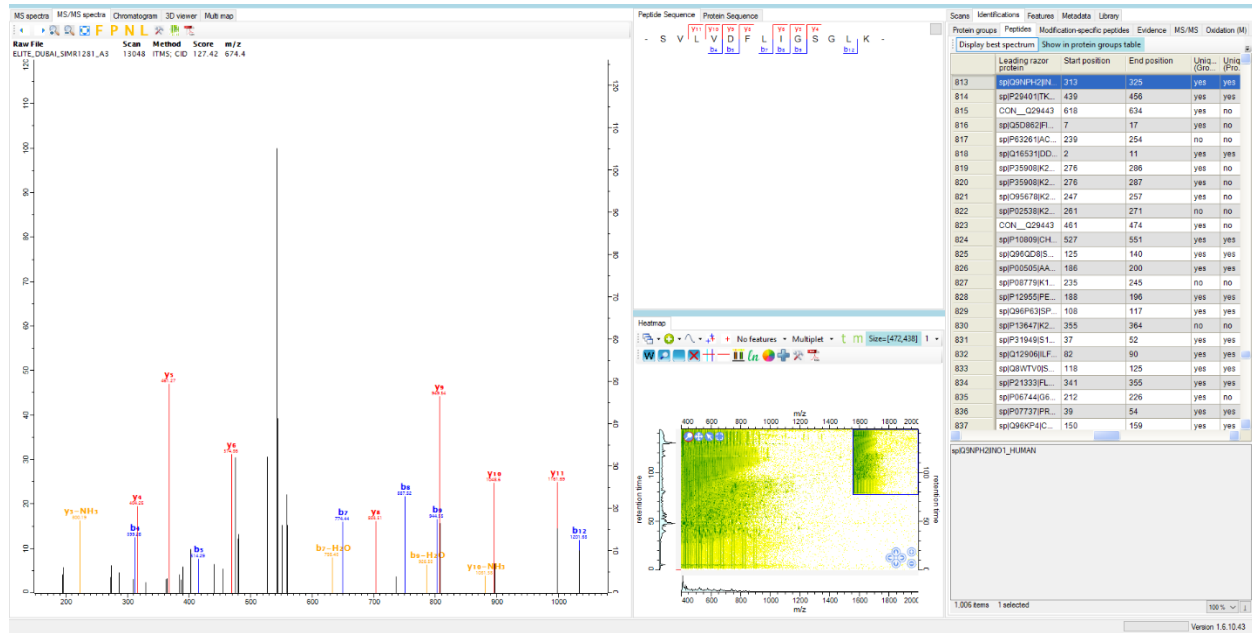

MS/MS fragmentation spectrum show both b- and y-ions of a peptide (SVLVDFLIGSGLK) assigned to sp|Q9NPH2|INO1\_HUMAN Inositol-3-phosphate synthase 1

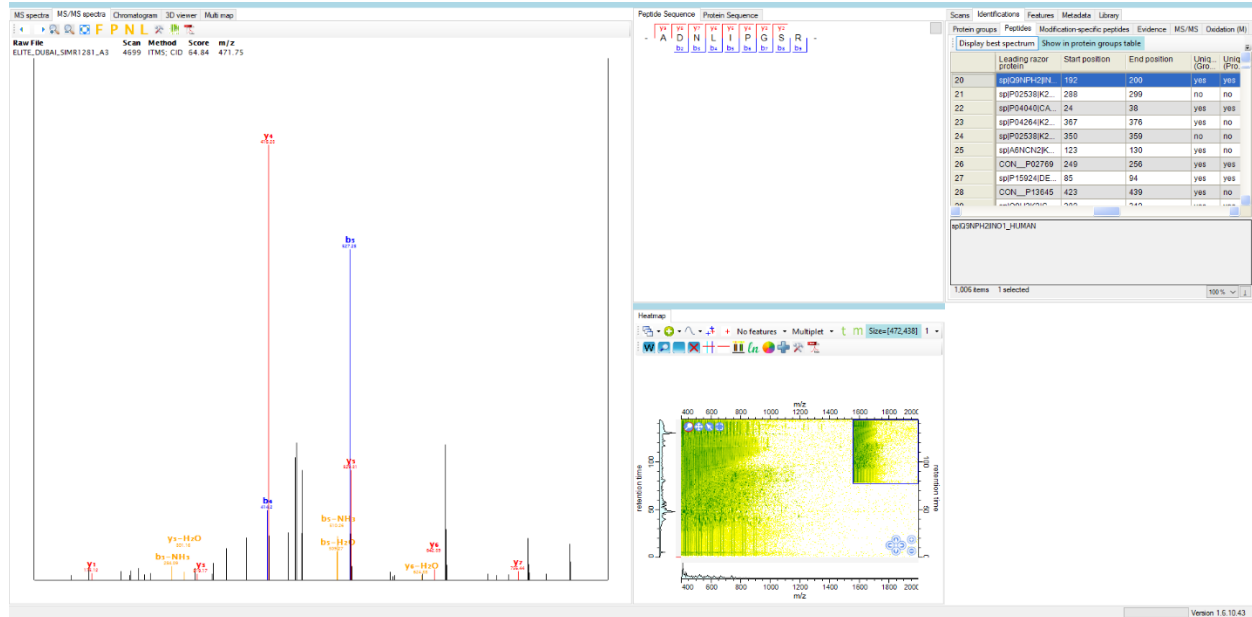

MS/MS fragmentation spectrum show both b- and y-ions of a peptide (ADNLIPGSR) assigned to sp|Q9NPH2|INO1\_HUMAN Inositol-3-phosphate synthase 1

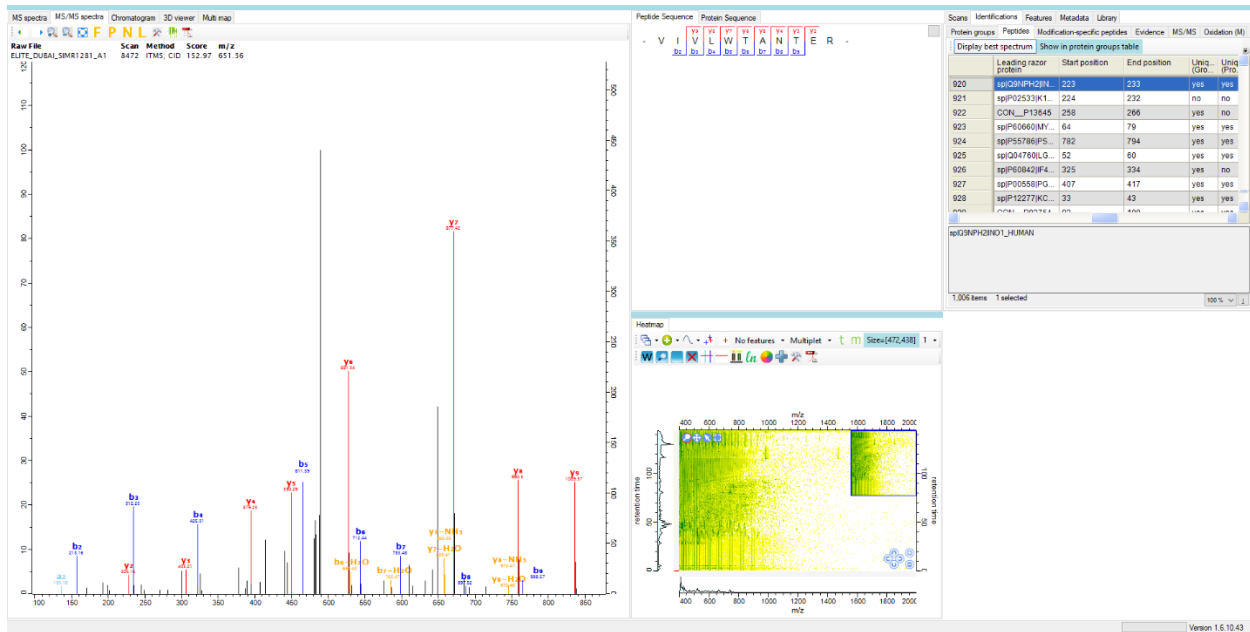

MS/MS fragmentation spectrum show both b- and y-ions of a peptide (**VIVLWTANTER**) assigned to **sp|Q9NPH2|INO1\_HUMAN Inositol-3-phosphate synthase 1**

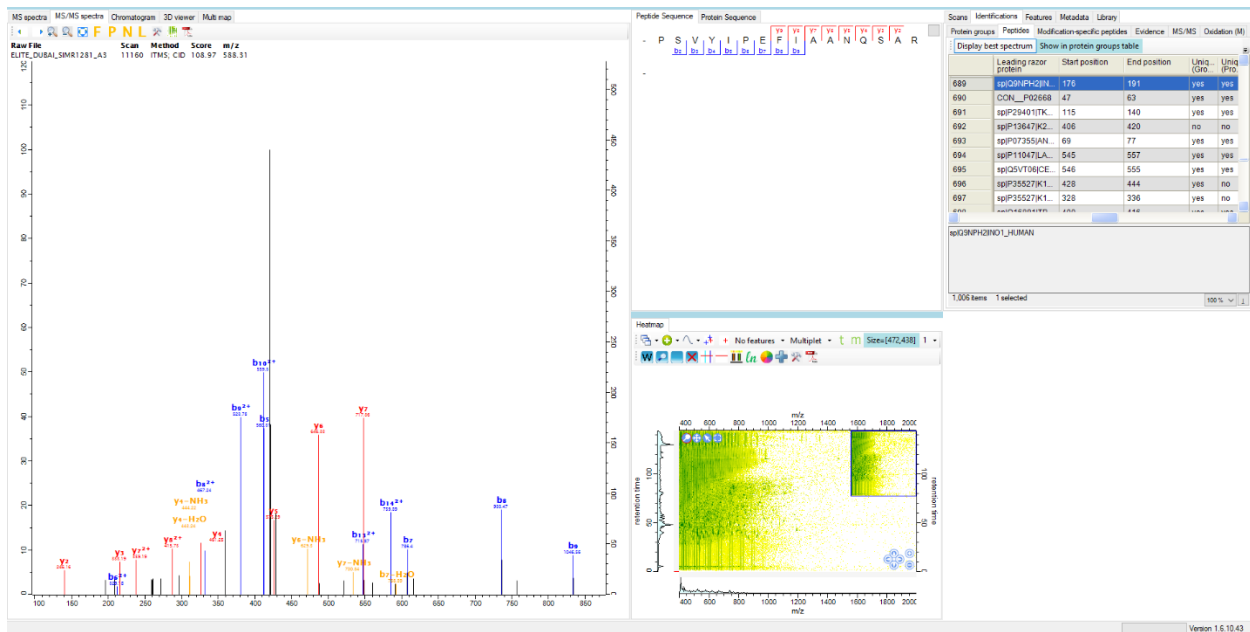

MS/MS fragmentation spectrum show both b- and y-ions of a peptide (**PSVYIPEFIAANQSAR**) assigned to **sp|Q9NPH2|INO1\_HUMAN Inositol-3-phosphate synthase 1**

**sp|P00390|GSHR\_HUMAN Glutathione reductase 1, mitochondrial**

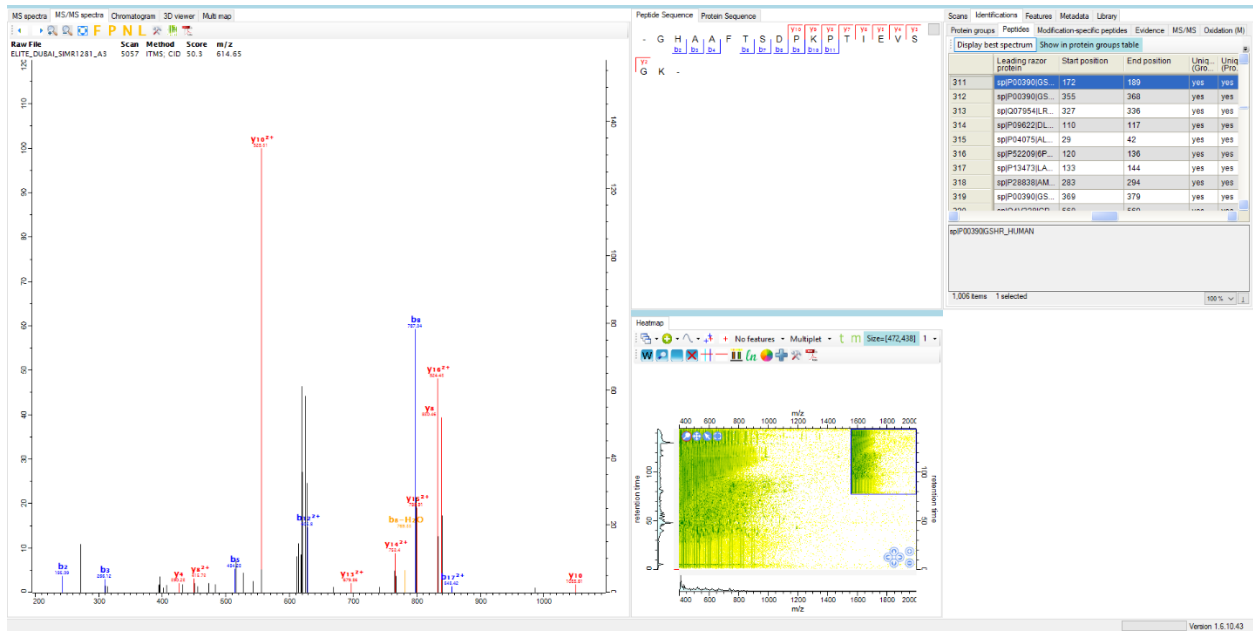

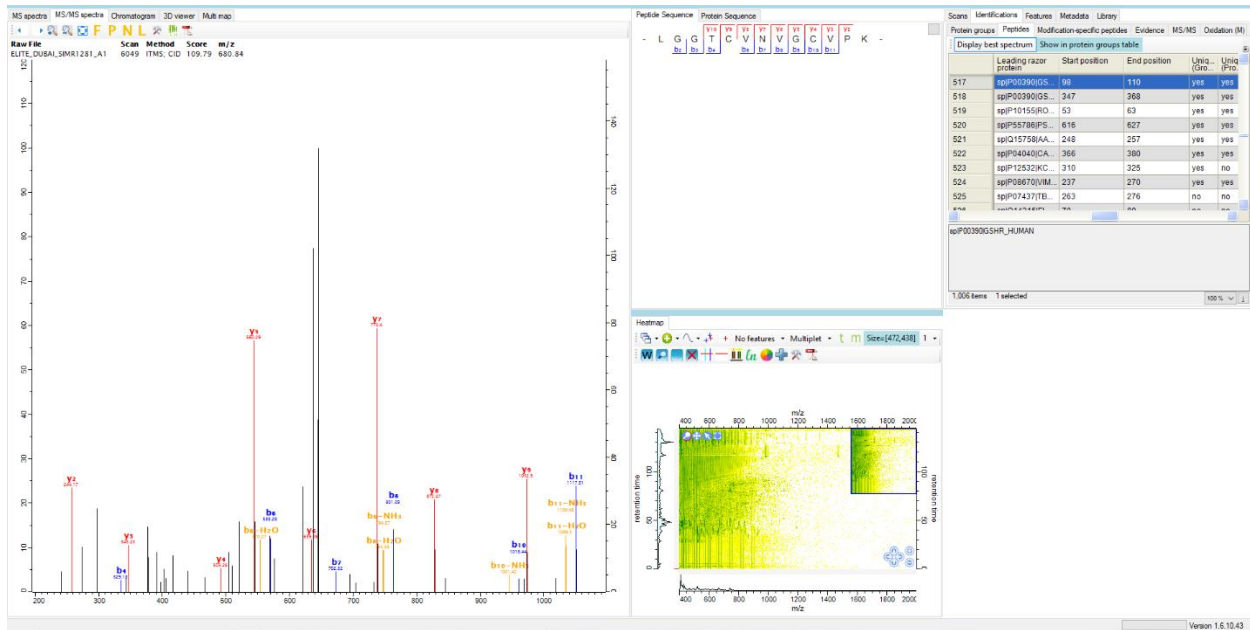

MS/MS fragmentation spectrum show both b- and y-ions of a peptide (**LGGTCVNVGCVPK**) assigned to **sp|P00390|GSHR\_HUMAN** Glutathione reductase 1, mitochondrial

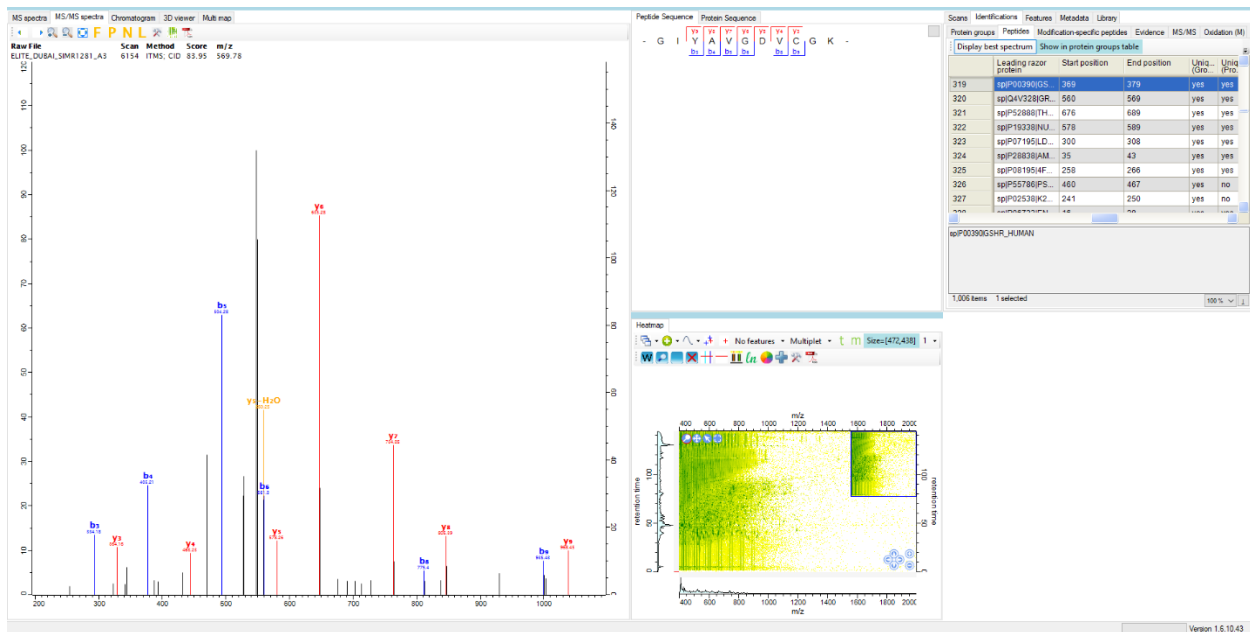

MS/MS fragmentation spectrum show both b- and y-ions of a peptide (**GIYAVGDCGK**) assigned to **sp|P00390|GSHR\_HUMAN** Glutathione reductase 1, mitochondrial

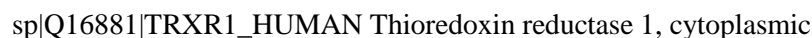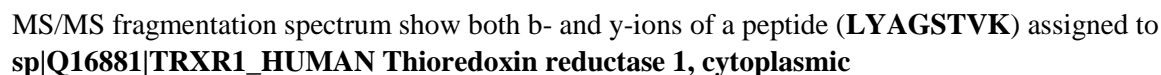

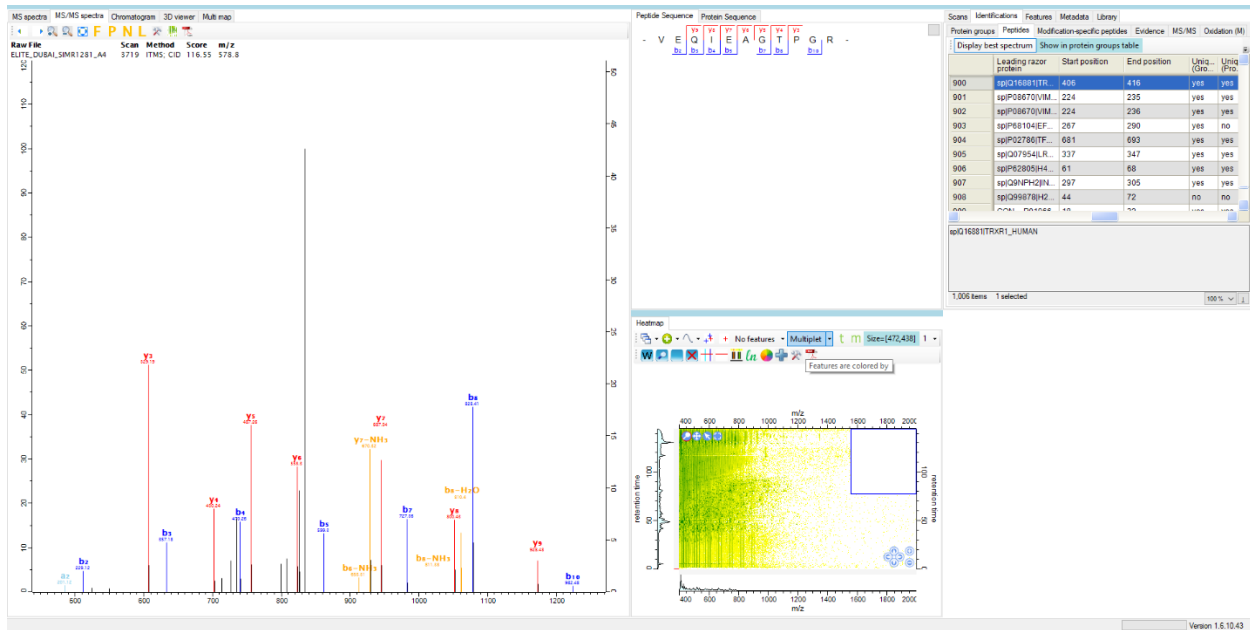

MS/MS fragmentation spectrum show both b- and y-ions of a peptide (**VEQIEAGTPGR**) assigned to **sp|Q16881|TRXR1\_HUMAN** Thioredoxin reductase 1, cytoplasmic

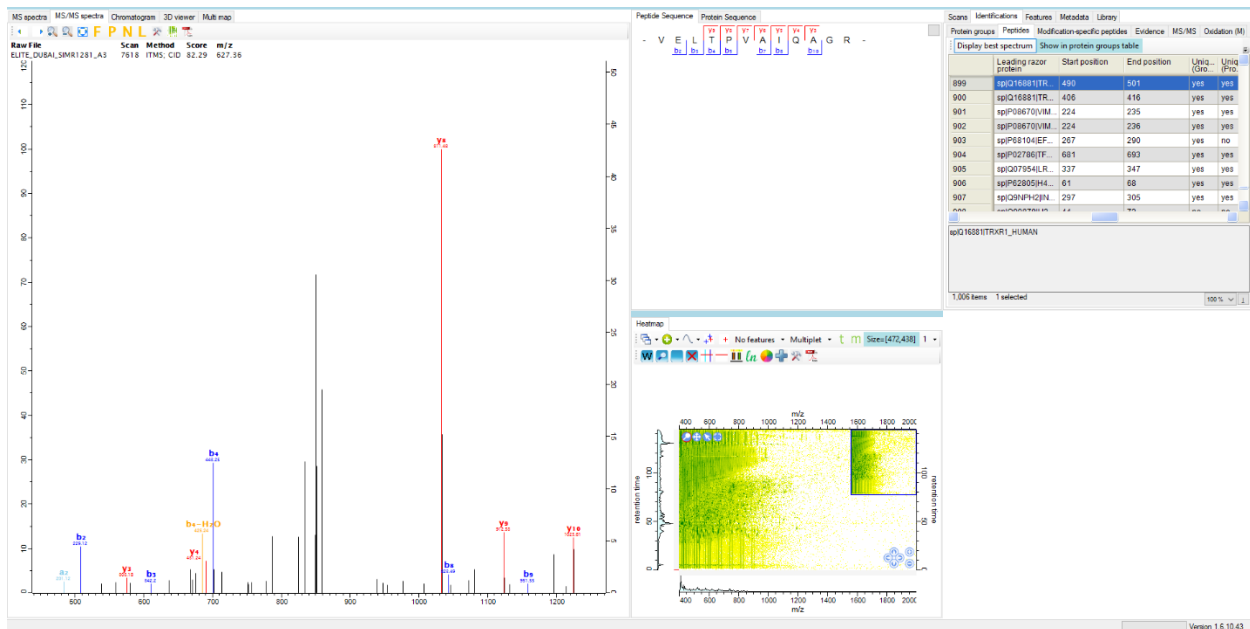

MS/MS fragmentation spectrum show both b- and y-ions of a peptide (**VELTPVAIQAGR**) assigned to **sp|Q16881|TRXR1\_HUMAN** Thioredoxin reductase 1, cytoplasmic

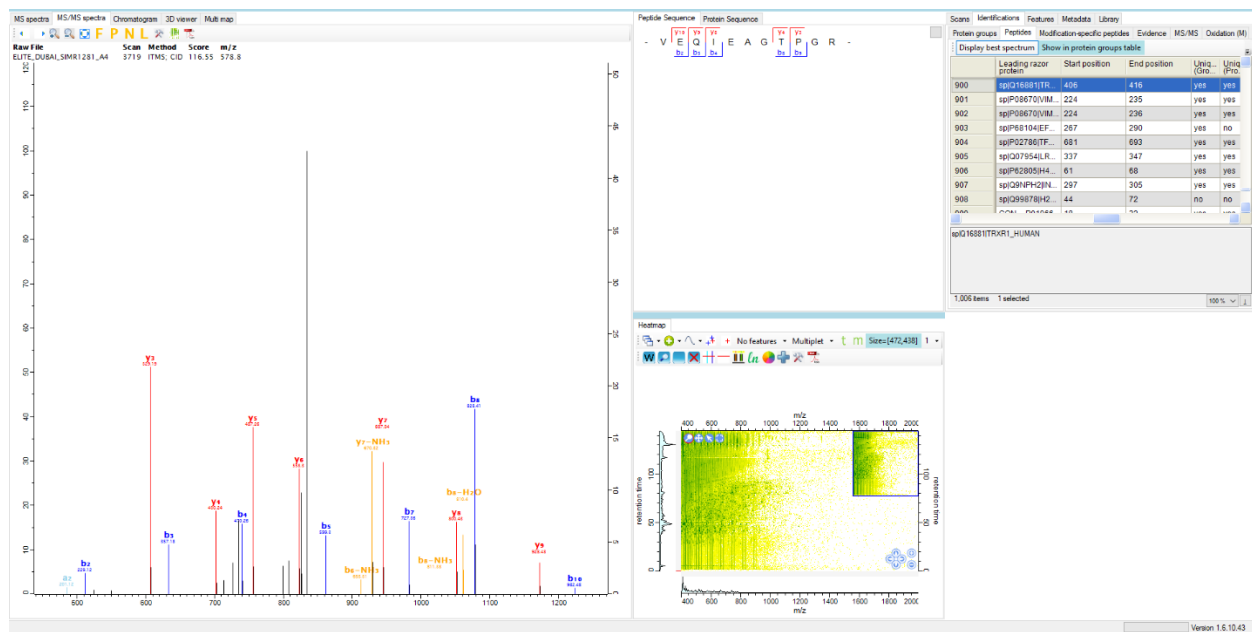

MS/MS fragmentation spectrum show both b- and y-ions of a peptide (**VEQIEAGTPGR**) assigned to **sp|Q16881|TRXR1\_HUMAN Thioredoxin reductase 1, cytoplasmic**

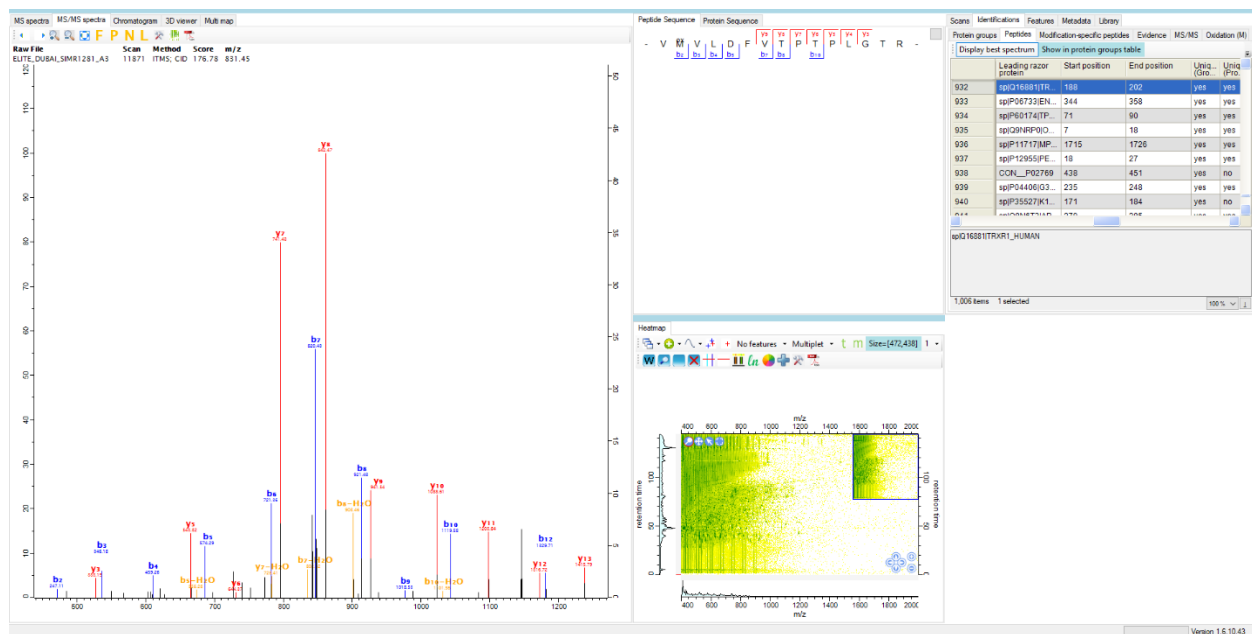

MS/MS fragmentation spectrum show both b- and y-ions of a peptide (**VMVLDFVTPTPLGTR**) assigned to **sp|Q16881|TRXR1\_HUMAN Thioredoxin reductase 1, cytoplasmic**
